# Supplementary material for: MYC predetermines the sensitivity of gastrointestinal cancer to antifolate drugs through regulating TYMS transcription
Source: PubMed Central journal article supplement — eBioMedicine. 2019 Oct 21;48:289–300. doi: 10.1016/j.ebiom.2019.10.003 (PMC6838448; doi:10.1016/j.ebiom.2019.10.003), 2019-10-21
Supplement: mmc4.pdf [file mmc4.pdf]

# MYC predetermines the sensitivity of gastrointestinal cancer to antifolate drugs through regulating *TYMS* transcription

1. Supplementary Figures 1-7

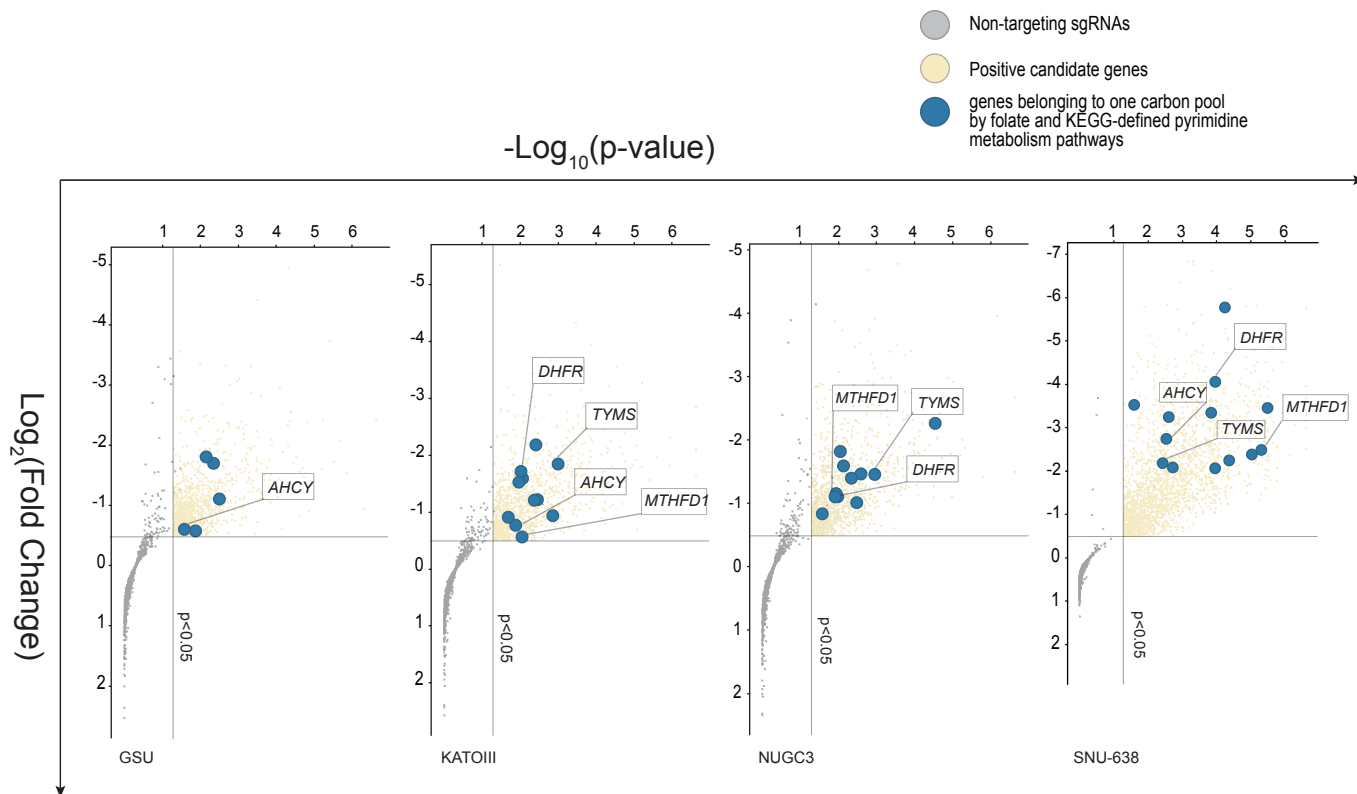

**Supplementary Fig. 1.** Volcano plot of selected genes and nontargeting sgRNAs in DMSO<sub>Day14</sub> vs DMSO<sub>Day0</sub> of four gastric cancer cell lines. Grey dots indicated non-targeting sgRNAs, and yellow dots indicated genes with  $\log_2(\text{fold change}) < -0.5$  and  $p < 0.05$ . Genes involved in one carbon pool by folate and KEGG-defined pyrimidine metabolism pathways were shown in blue dots. 1,000 non-targeting sgRNAs were used as control in all the four independent screening.

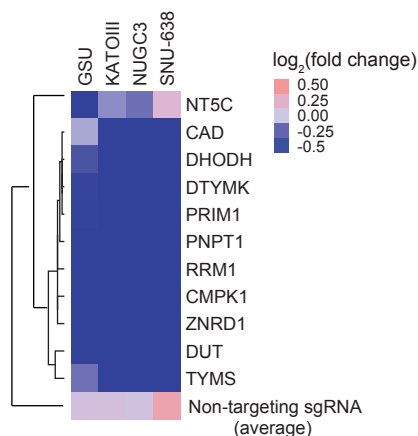

**Supplementary Fig. 2.** sgRNAs targeting genes in KEGG-defined pyrimidine metabolism pathway were significantly decreased after 14 days of cell culture. The average of 1,000 non-targeting sgRNAs was used as control.

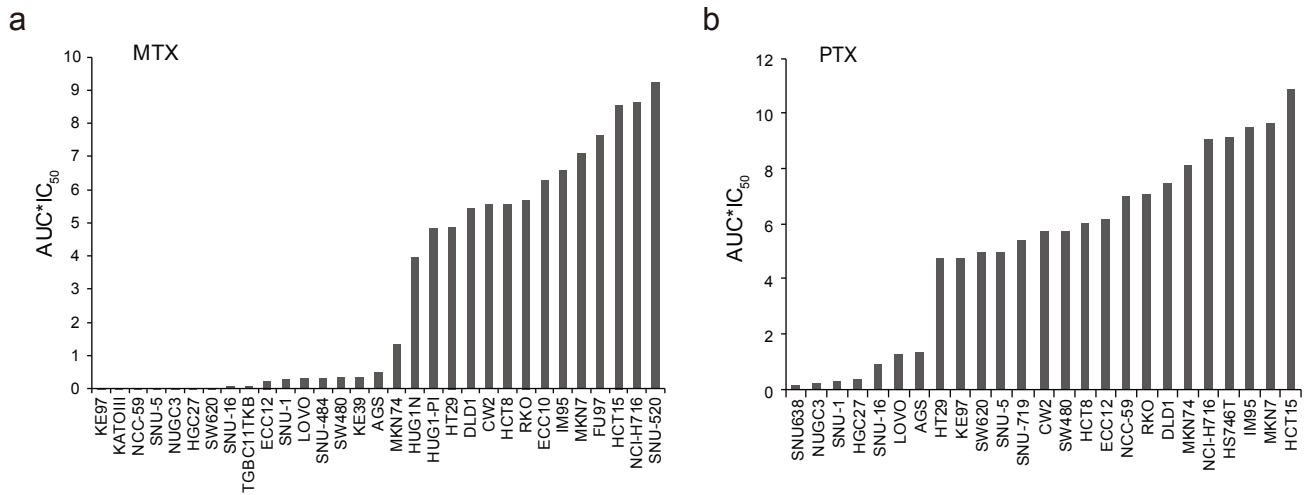

**Supplementary Fig. 3.** The cell viability of multiple gastrointestinal cancer cell lines under the treatment of MTX (a) and PTX (b).  $IC_{50}$  multiplied by AUC of MTX and PTX treatment was presented. The  $IC_{50}$  and AUC were calculated according to dose response curves, respectively.

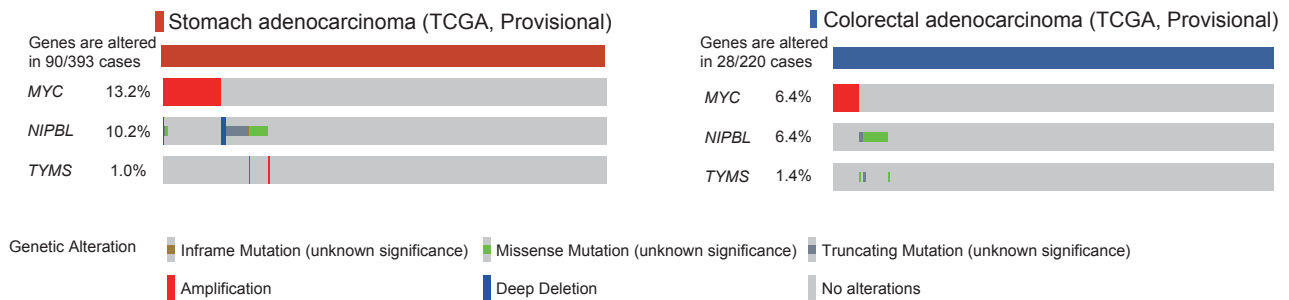

**Supplementary Fig. 4.** *MYC* and *NIPBL* are discretely mutated in both stomach and colorectal adenocarcinomas of TCGA provisional database. There're 53 *MYC*-amplified, 48 *NIPBL*-mutated and 4 *TYMS*-amplified cases in 393 stomach adenocarcinomas, and 14 *MYC*-amplified, 14 *NIPBL*-mutated and 3 *TYMS*-mutated cases in 220 colorectal adenocarcinomas. Tumour samples of TCGA provisional database with both mutation and copy number alternations were used in this study, without accounting *NIPBL*-amplified cases.

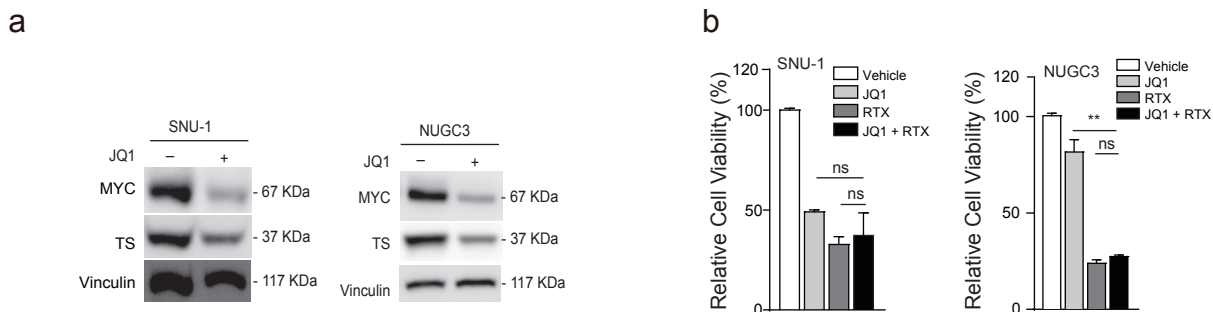

**Supplementary Fig. 5.** JQ1 significantly reduced the cell viability of SNU-1 and NUGC3 cell lines. (a) Immunoblotting analysis of the protein expression levels of MYC and thymidylate synthase in SNU-1 and NUGC3 after 1  $\mu$ M JQ1 treatment for 72 hours. (b) The relative cell viability of SNU-1 and NUGC3 after the treatment of indicated drugs. 10  $\mu$ M RTX and 10  $\mu$ M JQ1 were used to achieve the maximal inhibition.

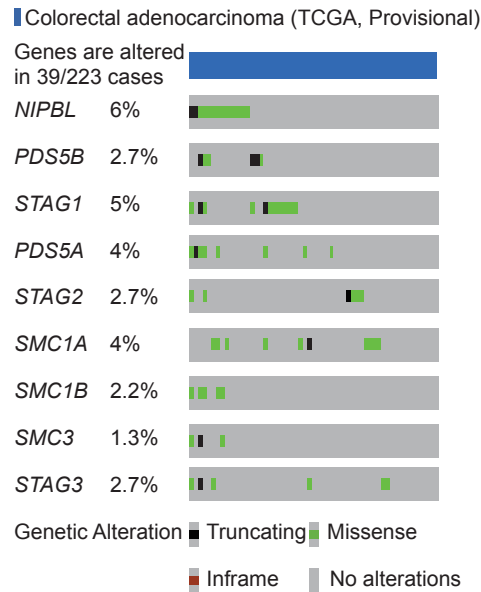

**Supplementary Fig. 6.** Mutation status of cohesin complex and -associated members in colorectal adenocarcinomas from TCGA provisional database. 223 tumour samples are available for analysing the mutation status of cohesin complex members.

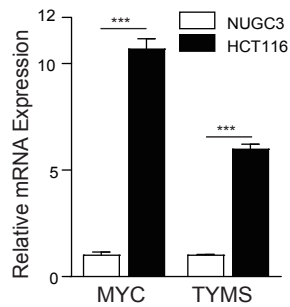

**Supplementary Fig. 7.** The relative MYC and TYMS mRNA expression levels of HCT116 cells to NUGC3 cells. The mRNA expression levels were detected by q-PCR, normalized by GAPDH.
